# Supplementary material for: 万能大口径削孔工法(BG工法)(施工材料の頁-180-)
Source: Royal Society of Chemistry journal article supplement (doi:10.1039/d1ra01240a), 1992-03-01
Supplement: d1ra01240a1.pdf [file d1ra01240a1.pdf]

## Supplementary Material

### Characterization

The phase composition of the samples was investigated by X-ray diffraction (XRD) on a Shimadzu XRD-6000 X-ray powder diffractometer. A scanning electron microscopy (SEM, JSM-6390A), energy dispersive spectroscopy (EDS, JSM-6390A) and high resolution transmission electron microscopy (HRTEM, Tecnai G2F20S-TWIN) were employed to observe the morphology and elemental compositions of CdSe/C/TiO<sub>2</sub>. The chemical status of the elements was identified with XPS (Kratos AXIS NOVA ). The absorption spectra of the samples were obtained by a UV-vis spectrophotometer (UV-3600) with a wavelength range of 200-800 nm. The photoluminescence spectrum (PL) was measured by a fluorescence intensimeter (Hitachi-F7000) using an excitation wavelength of 220 nm.

### Photoelectrochemical measurements

Photoelectrochemical performance of the prepared films was studied using the electrochemical workstation (CHI 660 E) under in a three electrode cell at room temperature. The measured samples, Pt foil and HgCl<sub>2</sub>/Hg were used as the working, counter and reference electrodes, respectively. 0.5 M Na<sub>2</sub>SO<sub>4</sub> aqueous solution was employed as the electrolyte for the MB degradation. The samples with 0.785 cm<sup>2</sup> surface area was irradiated using a 300 W Xe lamp. Before the reaction, the system kept in the dark for 30 minutes to reach the adsorption-desorption equilibrium. During the reaction, 3 mL of the solution was taken per 15 min to detect the degradation of MB through UV-Vis spectrophotometer at 664 nm.

Table S1 Related reports about TiO<sub>2</sub>-based pollutant degradation in the literatures.

| Catalyst                                                 | Photoelectrocatalyst(PEC) or photocatalyst(PC) | Pollutant | Degradation performance | Ref.      |
|----------------------------------------------------------|------------------------------------------------|-----------|-------------------------|-----------|
| CdSe/C/TiO <sub>2</sub>                                  | PEC                                            | MB        | 92.43% / 120min         | This work |
| CdSe/TiO <sub>2</sub> NTs                                | PEC                                            | MB        | About 60% / 240 min     | 1         |
| TiO <sub>2</sub> nanosheets@CdSe                         | PC                                             | MB        | 90.5% / 5 h             | 2         |
| TiO <sub>2</sub> /CdSe/RGO film                          | PC                                             | MB        | About 95% / 180 min     | 3         |
| CdSe/SiO <sub>2</sub>                                    | PC                                             | MB        | 90% / 180 min           | 4         |
| Bi <sub>2</sub> S <sub>3</sub> -BiOBr / TiO <sub>2</sub> | PEC                                            | RhB       | 93.68% / 120min         | 5         |
|                                                          |                                                | MO        | 56.75% / 120min         |           |
|                                                          |                                                | MB        | 90.53% / 120min         |           |
|                                                          |                                                | Cr(VI)    | 67.12% / 120min         |           |
| GQDs/TiO <sub>2</sub>                                    | PC                                             | MO        | About 95% / 120 min     | 6         |

1. P. Xue, Y. Yin, Y.o Wang, J. Wan, Y. Ma, E. Liu, X. Hu and J. Fan, *Semicond. Sci. Technol.*, 2017, **32**, 115007.
2. D. Xua, B. Liua, W. Zoua, H. Wang and C. Zhang, *Appl. Surf. Sci.*, 2019, **487**, 91–100.
3. Q. Shen, Y. Wang, J. Xue, G. Gao, X. Liu, H. Jia, Q. Li and B. Xu, *Appl. Surf. Sci.*, 2019, **481**, 1515-1523.
4. M. A. Ahmed, M. F. Abdel-Messih, E. H. *J. Mater. Sci-Mater. El.*, 2019, **30**,17527-17539.
5. D. Gao, L. Wang, Q. Wang, Z. Q, Y. Jia and C. Wang, *Spectrochimi. Acta A*, 2020, **229**, 117936.
6. D. Pan, J. Jiao, Z. Li, Y. Guo, C. Feng, Y. Liu, L. Wang and M. Wu, *ACS Sustainable Chem. Eng.* 2015, **3**, 2405-2413.

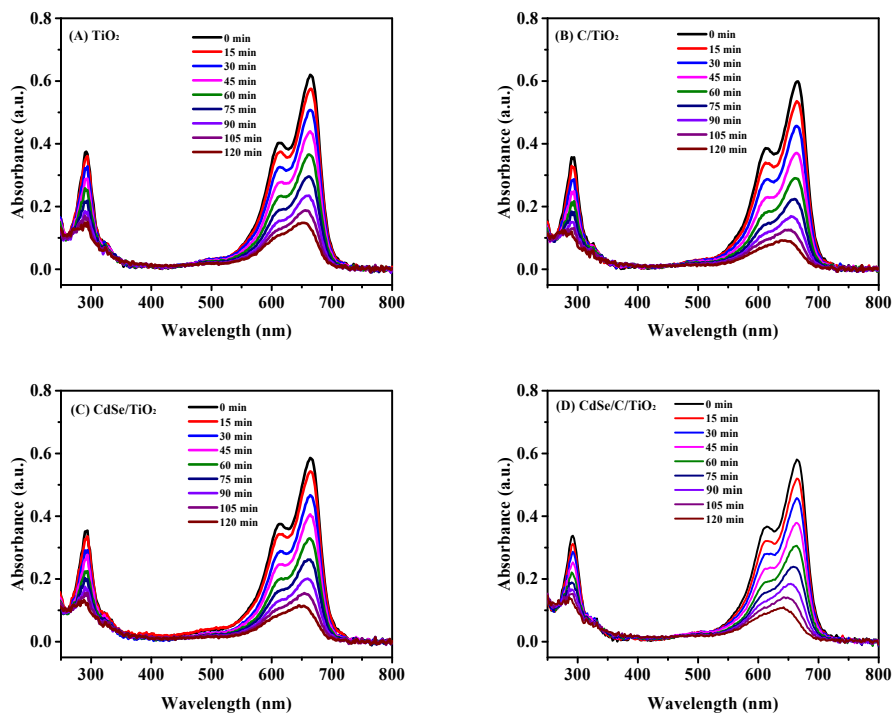

Fig. S1 Raw data for MB degradation.
